# Supplementary material for: Climate-induced storminess forces major increases in future storm surge hazard in the South China Sea region
Source: Copernicus journal article supplement (doi:10.5194/nhess-2021-397), 2022-01-17
Supplement: Supplementary file [file nhess-2021-397-AC1-supplement.pdf]

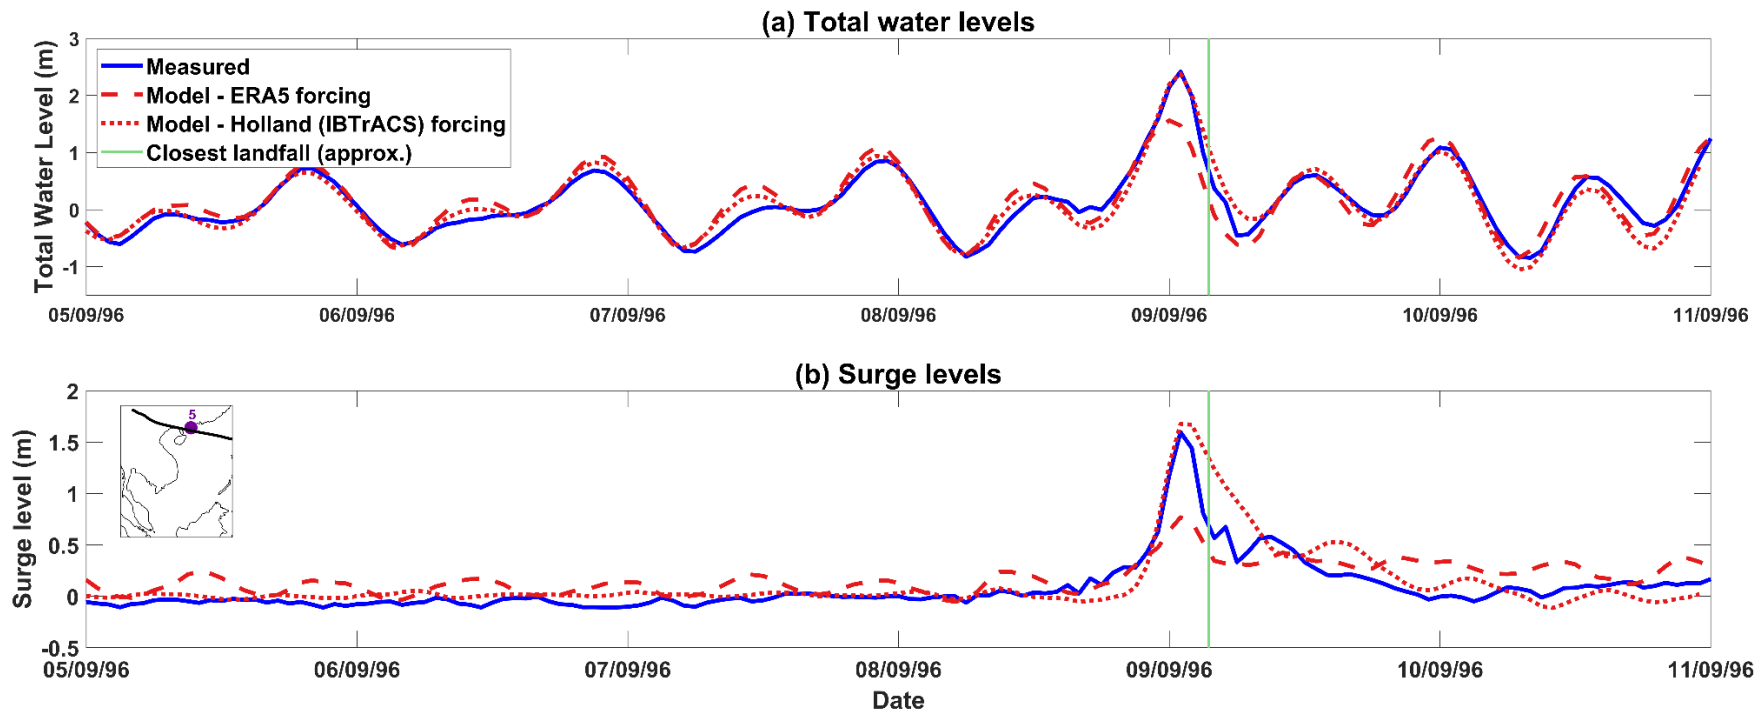

Fig S1 – New - Validating modelled surges using ERA5 (red dashed) and Holland Model using IBTrACS (red dotted) wind and pressure fields against measured data (blue): Typhoon Sally surge at tide gauge 5: Zhapo, China (inset or see Figure 1 for location), located closest to Zhapo station in the early hours of 9th September 1996 (green vertical line). Firstly (a) comparing total sea levels, and then (b) comparing surge-only water levels.

Table S1 – New - The Root Mean Square Error (m) between (a) measured (tide gauge) and modelled total water levels and (b) tide-removed measured data and modelled surge-only water levels from all the validation simulations.

| Typhoon name (date)       | (a) Total Water Level RMSE (cm) |                              | (b) Surge-only Water Level RMSE (cm) |                              |
|---------------------------|---------------------------------|------------------------------|--------------------------------------|------------------------------|
|                           | ERA5 data                       | IBTrACS data + Holland model | ERA5 data                            | IBTrACS data + Holland model |
| Maring (September 1996)   | 33                              | 30                           | 20                                   | 15                           |
| Linda (November 1997)     | 41                              | 28                           | 39                                   | 20                           |
| Mangkhut (September 2018) | 42                              | 20                           | 36                                   | 15                           |
| Ketsana (September 2009)  | 40                              | 18                           | 34                                   | 10                           |

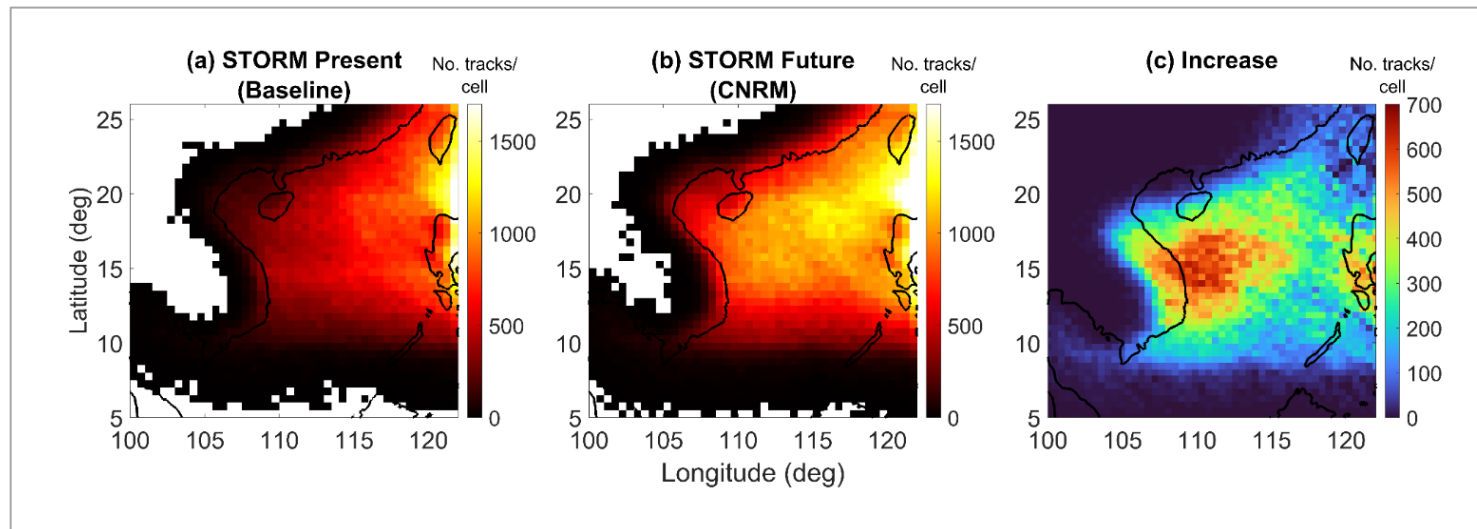

Fig 5. Revised - Left: Baseline STORM track density of Saffir Simpson Category 1+, Middle: CNRM climate model- Future STORM track density, of Saffir Simpson Category 1+, and Right: The cyclone path density difference between them (Saffir Simpson Category 1+ only - i.e. excluding Tropical Storms). Track density is the number of tracks passing through a grid cell.
