# Supplementary material for: Climate-induced storminess forces major increases in future storm surge hazard in the South China Sea region
Source: Copernicus journal article supplement (doi:10.5194/nhess-2021-397), 2022-01-17
Supplement: Supplementary file [file nhess-2021-397-AC2-supplement.pdf]

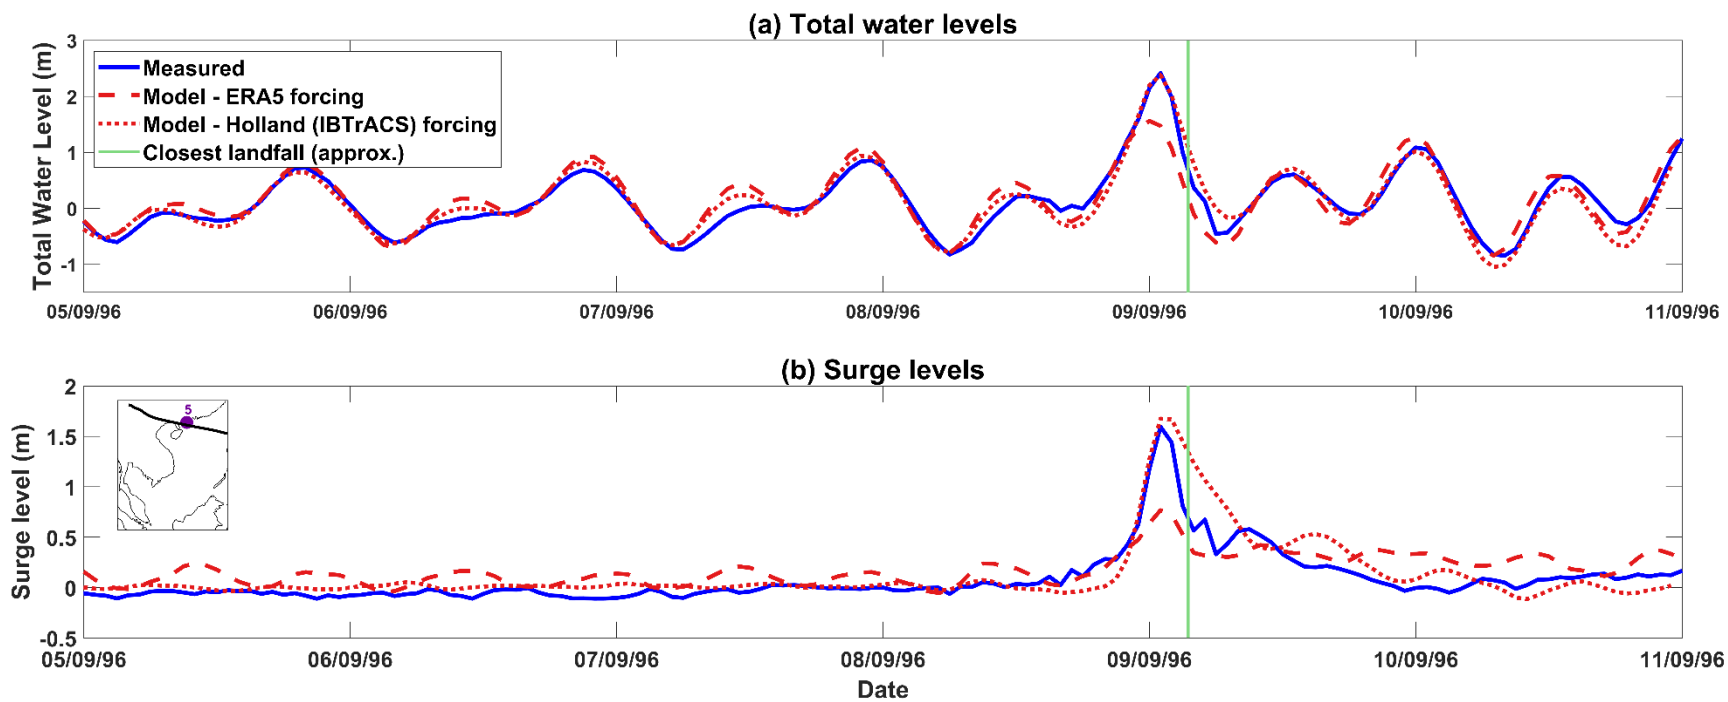

Figure S1 - Validating modelled surges using ERA5 (red dashed) and Holland Model using IBTrACS (red dotted) wind and pressure fields against measured data (blue): Typhoon Sally surge at tide gauge 5: Zhapo, China (inset or see Figure 1 for location), located closest to Zhapo station in the early hours of 9th September 1996 (green vertical line). Firstly (a) comparing total sea levels, and then (b) comparing surge-only water levels.

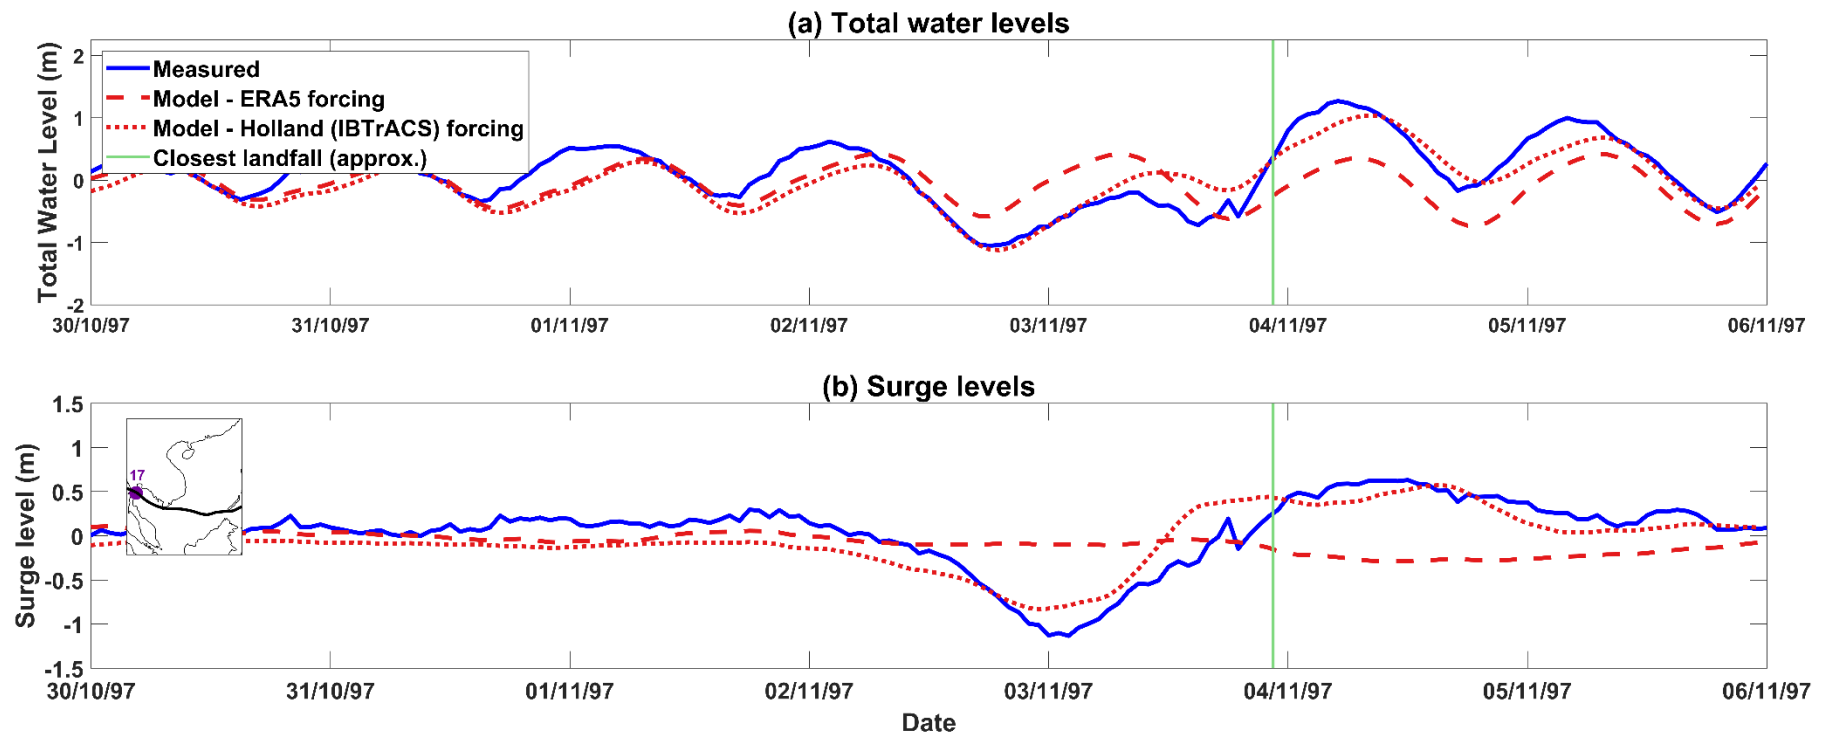

Figure S2 - Validating modelled surges using ERA5 (red dashed) and Holland Model using IBTrACS (red dotted) wind and pressure fields against measured data (blue): tropical storm Linda storm surge at tide gauge 17: Ko Lak, Thailand (inset or see Figure 1 for location) which made landfall late on 3rd November 1997 (green vertical line). Firstly (a) comparing total sea levels, and then (b) comparing surge-only water levels.

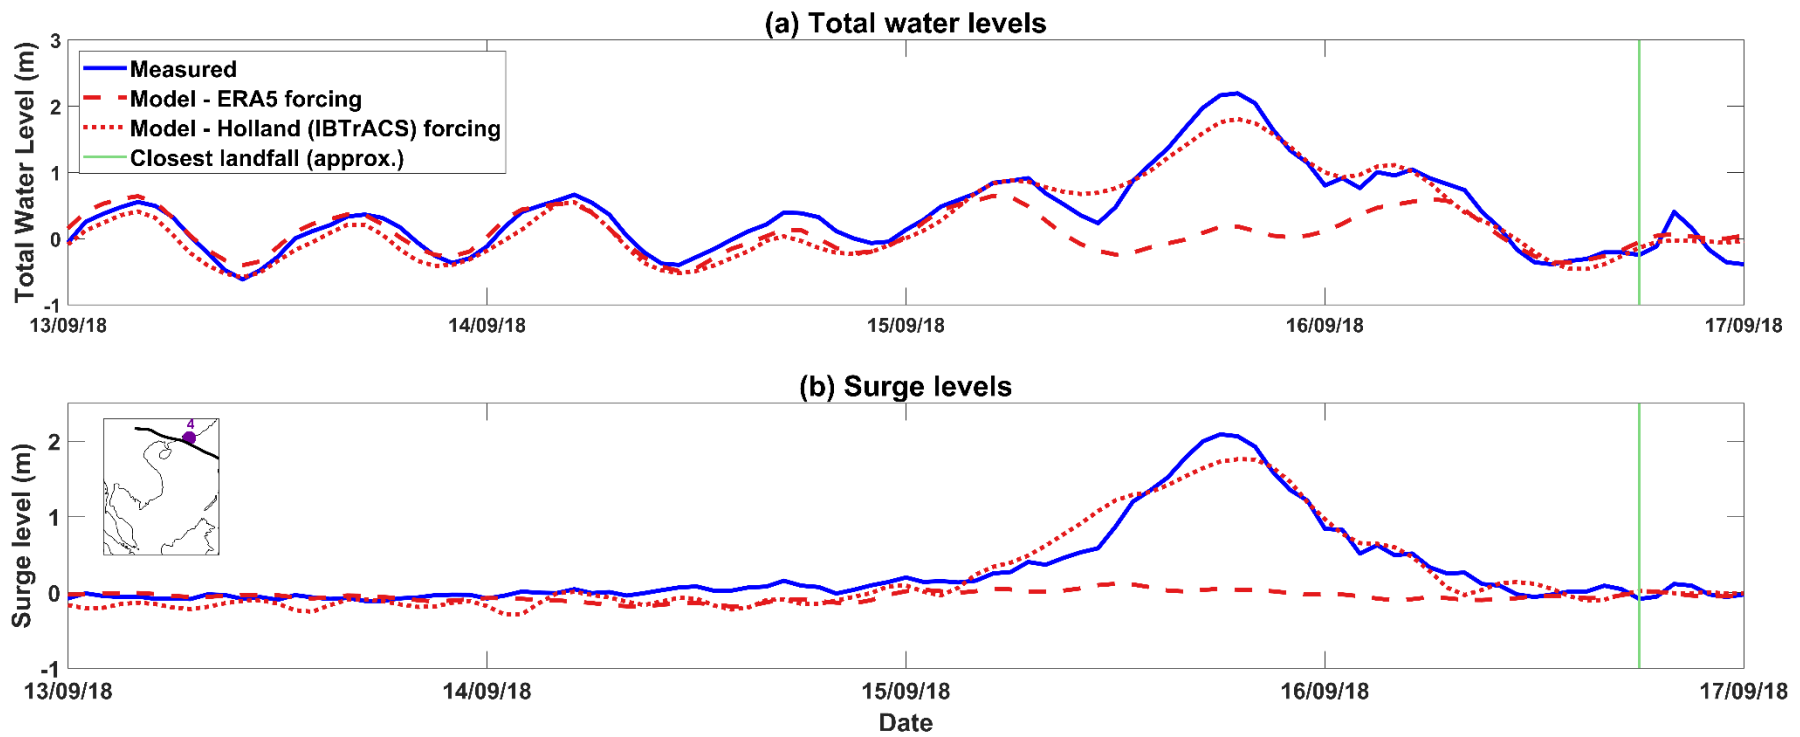

Figure S3 - Validating modelled surges using ERA5 (red dashed) and Holland Model using IBTrACS (red dotted) wind and pressure fields against measured data (blue): Typhoon Mangkhut storm surge at tide gauge 4: Hong Kong, China (inset or see Figure 1 for location). Firstly (a) comparing total sea levels, and then (b) comparing surge-only water levels. Mangkhut made landfall west of Hong Kong in the evening of 16th September 2018 (green vertical line).

**(b) Bathymetry and Export Points**

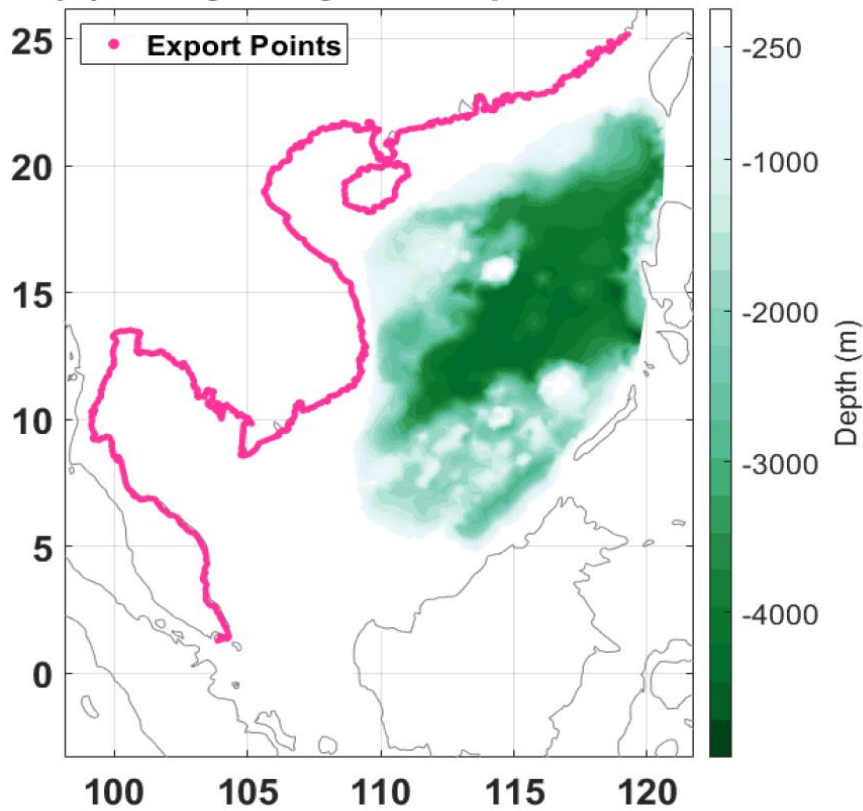

**(b) Nearshore bathymetry**

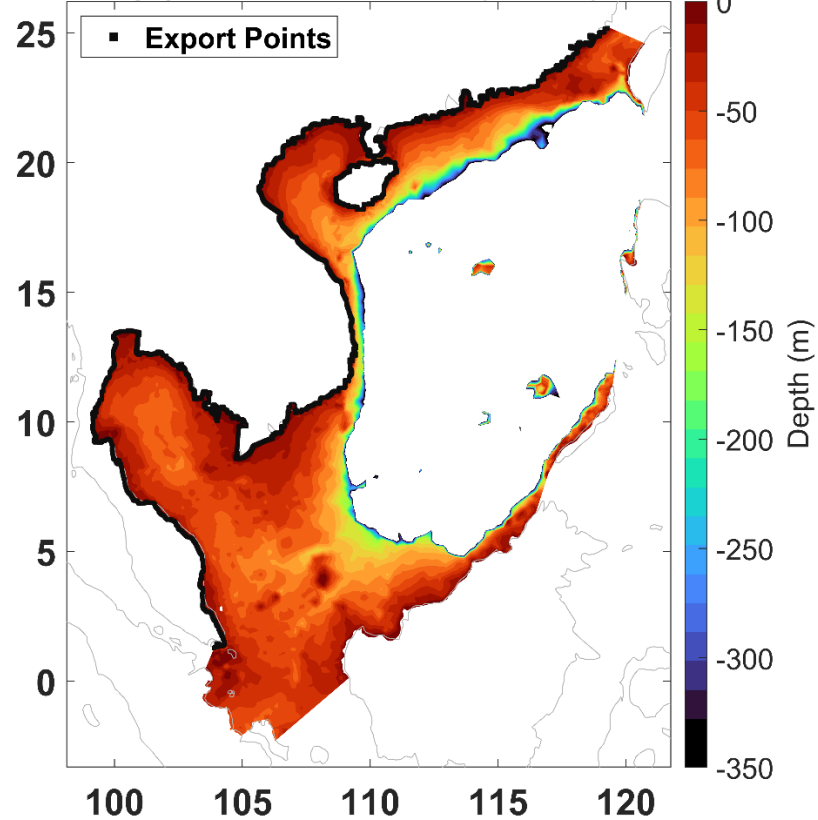

*Comparison of Figure 2b- Left is original, Right is updated bathymetry and colorbar. [ this is SRTM15+ ocean bathymetry for nearshore in our South China Sea domain, showing down to 250 m depth only, and the specific Output Coastline Points (black) exported from the model.]*
